# Supplementary material for: Data on prognostication models comparison for neurological recovery after cardiac arrest using proton chemical shift imaging (1H-CSI)
Source: PubMed Central journal article supplement (PMC6222258; doi:10.1016/j.dib.2018.10.066), 2018-10-25
Supplement: mmc1.pdf [file mmc1.pdf]

## AUTHOR DECLARATION

We wish to confirm that there are no known conflicts of interest associated with this publication and there has been no significant financial support for this work that could have influenced its outcome.

We confirm that the manuscript has been read and approved by all named authors and that there are no other persons who satisfied the criteria for authorship but are not listed. We further confirm that the order of authors listed in the manuscript has been approved by all of us.

We confirm that we have given due consideration to the protection of intellectual property associated with this work and that there are no impediments to publication, including the timing of publication, with respect to intellectual property. In so doing we confirm that we have followed the regulations of our institutions concerning intellectual property.

We further confirm that any aspect of the work covered in this manuscript that has involved human patients has been conducted with the ethical approval of all relevant bodies and that such approvals are acknowledged within the manuscript.

We understand that the Corresponding Author is the sole contact for the Editorial process (including Editorial Manager and direct communications with the office). He is responsible for communicating with the other authors about progress, submissions of revisions and final approval of proofs. We confirm that we have provided a current, correct email address which is accessible by the Corresponding Author and which has been configured to accept email from [quintard.h@chu-nice.fr](mailto:quintard.h@chu-nice.fr)

Signed by all authors as follows:

1) *Hervé Quintard*

Date : March 3, 2018

Signature :

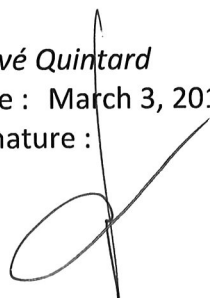

2) *Lionel Velly*

Date : March 3, 2018

Signature :



4) *Xavier Chiosi*

Date :

Signature :

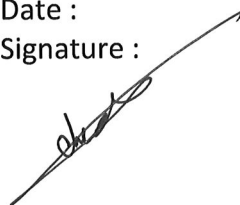

5) *Marie-Eve Amoretti*

Date :

Signature :



7) *Carole Ichai*

Date : March 3, 2018

Signature :

CHU DE NICE - Hôpital PASTEUR 2  
30 voie Romaine - CS 51069 - 06001 Nice Cedex 1  
Pôle Anesthésie - Réanimations  
Professeur Carole ICHAI  
Chef de Service  
Réanimation Polyvalente et Surveillance Continue  
Finess : 06 0 78500 3 - RPPS : 10003292256

3) *Salah Boussem*  
Date : March 3, 2018  
Signature :

A handwritten signature in black ink, consisting of several loops and a long horizontal stroke at the bottom.

6) *Elodie Cervantes*  
Date :  
Signature :

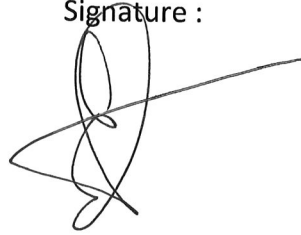A handwritten signature in black ink, featuring a large, stylized loop and a long horizontal stroke extending to the right.
